# Supplementary material for: Computational Analysis and Prediction of the Binding Motif and Protein Interacting Partners of the Abl SH3 Domain
Source: PLoS Comput Biol. 2006 Jan 27;2(1):e1. doi: 10.1371/journal.pcbi.0020001 (PMC1356089; doi:10.1371/journal.pcbi.0020001)
Supplement: Table S2 — (56 KB DOC) [file pcbi.0020001.st002.doc]

Table S2. The energetic components and binding affinities for the 15 peptide ligands of the Abl SH3 domain using interior dielectric constant of 2 (kcal/mol).

| No. | Sequence | Gexp | *E*ele | *E*vdw | *G*SA | *G*PB | TS | Glig_bound | Glig_unbound | Gpred | Gpred |
| --- | --- | --- | --- | --- | --- | --- | --- | --- | --- | --- | --- |
| A1 | APSYSPPPPP | -7.94 | -46.0  1.7 | -49.6  0.4 | -5.3  0.0 | 29.4  1.4 | -31.2  0.2 | 163.3  0.5 | 160.6  1.6 | -37.6  0.8 | 0.0 |
| A2 | APTMPPPLPP | -6.17 | -35.7  2.5 | -49.5  0.4 | -5.4  0.1 | 24.1  2.3 | -33.6  0.3 | 155.4  0.6 | 151.2  0.7 | -28.9  0.6 | 8.7 |
| A3 | PPAYPPPPVP | -7.23 | -41.6  1.8 | -50.8  0.5 | -5.4  0.0 | 26.3  1.1 | -31.8  0.1 | 212.7  0.6 | 210.4  0.3 | -37.4  0.3 | 0.2 |
| A4 | FGTYPPPLPP | -7.03 | -35.2  3.7 | -49.9  0.2 | -5.6  0.0 | 23.0  2.3 | -33.0  0.3 | 153.0  0.3 | 151.3  1.1 | -33.0  0.7 | 4.6 |
| A5 | SPSYSPPPPP | -7.83 | -50.0  1.8 | -48.2  1.0 | -5.2  0.0 | 30.7  0.6 | -31.9  0.1 | 149.7  1.0 | 149.3  0.5 | -40.51  1.0 | -2.9 |
| A6 | APTYSPPPPP | -8.72 | -51.6  9.5 | -50.2  1.6 | -5.4  0.1 | 31.3  8.2 | -31.1  0.4 | 145.9  1.5 | 142.8  0.5 | -41.7  0.5 | -4.1 |
| A7 | APTMSPPLPP | -6.37 | -40.4  4.2 | -50.6  0.8 | -5.3  0.0 | 27.0  3.2 | -33.8  0.3 | 137.7  2.2 | 137.0  1.6 | -34.7  1.0 | 2.9 |
| A8 | APTYPPPLNP | -5.48 | -48.8  4.0 | -51.3  0.5 | -5.5  0.0 | 30.6  2.7 | -31.6  0.4 | 128.0  1.2 | 122.2  0.1 | -37.6  0.2 | 0.0 |
| A9 | APTYHPPLPP | -5.30 | -37.6  0.7 | -51.2  0.5 | -5.4  0.0 | 25.8  0.6 | -30.9  0.1 | 166.8  1.9 | 161.9  0.7 | -32.6  1.2 | 5.0 |
| A10 | APTMPPPPPP | -6.95 | -40.4  2.5 | -48.9  0.6 | -5.3  0.0 | 26.1  2.3 | -33.4  0.4 | 155.0  1.2 | 154.6  0.1 | -34.7  0.4 | 2.9 |
| A11 | APTYPPPLPH | -6.23 | -41.9  2.1 | -53.6  0.7 | -5.7  0.0 | 28.0  1.7 | -32.0  0.2 | 164.0  1.9 | 154.4  0.7 | -31.6  0.8 | 6.0 |
| A12 | APTYPPPLPL | -6.17 | -43.8  3.3 | -51.8  0.4 | -5.5  0.1 | 28.8  2.8 | -31.3  0.4 | 141.5  1.3 | 136.5  0.2 | -36.1  0.4 | 1.5 |
| A13 | APTYPPPPPP | -7.36 | -46.9  3.6 | -50.2  0.5 | -5.3  0.1 | 29.1  3.3 | -31.4  0.2 | 157.2  0.7 | 156.6  0.9 | -41.3  0.8 | -3.7 |
| A14 | APTYSPPLPP | -7.23 | -45.1  4.8 | -51.2  0.3 | -5. 5  0.1 | 29.1  3.9 | -32.2  0.0 | 143.0  0.9 | 137.2  0.7 | -34.6  0.6 | 3.0 |
| A15 | ALPYPPPLPP | -5.93 | -47.6  0.6 | -45.7  0.1 | -5.1  0.0 | 29.8  0.5 | -32.9  0.4 | 187.7  0.5 | 183.8  1.3 | -32.8  0.8 | 4.8 |
