# Supplementary material for: Computational Analysis and Prediction of the Binding Motif and Protein Interacting Partners of the Abl SH3 Domain
Source: PLoS Comput Biol. 2006 Jan 27;2(1):e1. doi: 10.1371/journal.pcbi.0020001 (PMC1356089; doi:10.1371/journal.pcbi.0020001)
Supplement: Table S4 — (62 KB DOC) [file pcbi.0020001.st004.doc]

Table S4. The binding free energies for the 20 peptides mutated at position P-3 (kcal/mol)

| No. | Sequence | *E*ele | *E*vdw | *G*SA | *G*PB | Glig_bound | Glig_free | Gpred | Gpred |
| --- | --- | --- | --- | --- | --- | --- | --- | --- | --- |
| 1 | APSASPPPPP | -90.8  6.8 | -44.2  0.2 | -4.9  0.1 | 108.1  6.5 | -19.0  0.6 | -23.8  0.7 | -27.1  0.6 | 6.7 |
| 2 | APSRSPPPPP | -186.1  9.9 | -47.5  0.3 | -5.4  0.1 | 212.2  8.8 | -151.2  1.3 | -153.2  1.8 | -24.6  0.3 | 9.1 |
| 3 | APSNSPPPPP | -91.6  4.3 | -44.2  0.9 | -4.9  0.1 | 109.0  4.1 | -66.9  0.6 | -67.2  0.7 | -31.5  1.1 | 2.3 |
| 4 | APSDSPPPPP | -21.4  5.7 | -46.7  0.5 | -5.0  0.0 | 51.0  5.9 | -72.1  1.3 | -76.7  0.4 | -17.4  0.9 | 16.4 |
| 5 | APSCSPPPPP | -115.2  3.1 | -42.4  0.2 | -5.1  0.1 | 129.0  2.6 | -18.2  1.7 | -19.6  0.9 | -32.2  0.9 | 1.6 |
| 6 | APSQSPPPPP | -69.4  3.6 | -47.4  0.9 | -5.1  0.1 | 88.1  4.4 | -89.6  0.3 | -93.0  1.1 | -30.5  0.4 | 3.3 |
| 7 | APSESPPPPP | -34.9  10.4 | -45.1  1.1 | -5.0  0.0 | 61.1  9.7 | -111.3  0.9 | -113.2  1.3 | -21.8  0.7 | 12.0 |
| 8 | APSGSPPPPP | -99.0  7.9 | -43.3  1.3 | -4.8  0.1 | 115.1  7.6 | -25.5  1.1 | -27.0  0.2 | -30.5  2.1 | 3.3 |
| 9 | APSHSPPPPP | -93.3  5.4 | -46.2  1.6 | -5.1  0.0 | 111.5  5.8 | -32.3  0.7 | -34.9  0.9 | -30.5  0.99 | 3.3 |
| 10 | APSISPPPPP | -76.3  7.7 | -46.6  0.5 | -5.0  0.0 | 95.0  7.1 | -25.5  0.7 | -26.1  0.5 | -32.3  0.4 | 1.5 |
| 11 | APSLSPPPPP | -103.0  5.8 | -43.7  0.4 | -4.9  0.1 | 119.1  5.4 | -17.3  1.0 | -17.5  0.7 | -32.3  0.9 | 1.5 |
| 12 | APSKSPPPPP | -219.4  3.2 | -47.2  0.3 | -5.4  0.0 | 245.9  2.7 | -36.4  0.8 | -37.7  1.3 | -24.7  0.6 | 9.1 |
| 13 | APSMSPPPPP | -69.7  6.9 | -49.1  0.4 | -5.3  0.0 | 89.6  5.3 | -28.3  0.6 | -29.3  1.0 | -33.5  0.3 | 0.3 |
| 14 | APSFSPPPPP | -79.7  4.5 | -48.6  0.6 | -5.2  0.0 | 98.4  4.4 | -11.4  1.1 | -11.8  1.7 | -35.3  0.5 | -1.5 |
| 15 | APSPSPPPPP | -96.9  10.4 | -45.2  0.9 | -4.9  0.1 | 112.6  10.8 | 2.3  1.5 | 0.1  0.3 | -32.9  0.3 | 0.9 |
| 16 | APSSSPPPPP | -114.7  6.7 | -41.8  0.5 | -5.1  0.1 | 127.8  6.8 | -21.0  0.3 | -25.3  0.8 | -28.8  0.8 | 5.0 |
| 17 | APSTSPPPPP | -76.1  8.7 | -45.6  0.5 | -4.9  0.0 | 94.7  8.4 | -63.3  0.7 | -64.3  0.2 | -30.3  0.8 | 3.5 |
| 18 | APSWSPPPPP | -87.7  9.3 | -50.7  0.7 | -5.3  0.0 | 108.1  8.8 | -1.9  0.8 | -2.4  1.3 | -35.9  1.4 | -2.1 |
| 19 | APSVSPPPPP | -84.8  5.8 | -44.9  0.2 | -4.8  0.1 | 103.1  5.4 | -12.6  1.0 | -13.9  0.4 | -30.5  1.7 | 3.3 |
| 20 | APSYSPPPPP | -92.0  3.4 | -49.6  0.4 | -5.3  0.0 | 112.5  2.9 | -17.8  0.6 | -18.3  1.5 | -33.8  0.7 | 0.0 |
